# Supplementary material for: PEGylation Prolongs the Half-Life of Equine Anti-SARS-CoV-2 Specific F(ab’)2
Source: MDPI journal article supplement (doi:10.3390/ijms24043387), 2023-02-08
Supplement: s1 [file s1]

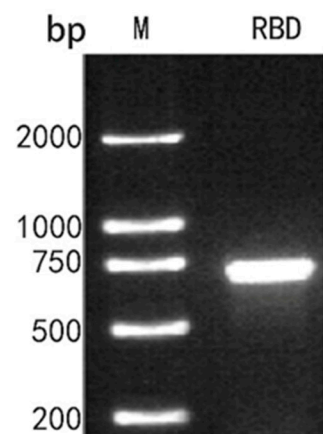

(a)

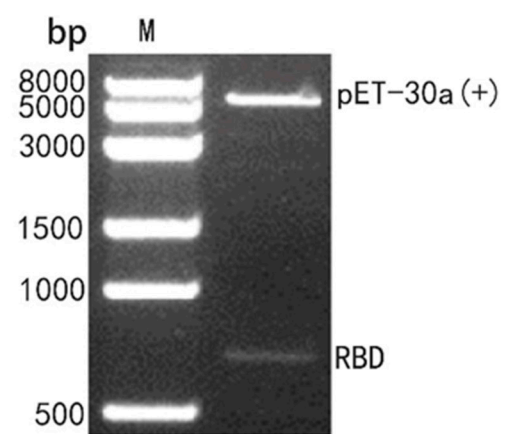

(b)

**Figure S1.** (a) PCR identification results of RBD gene. (b) PCR identification of recombinant expression plasmid PET-30a(+)-RBD.
